# Supplementary material
Source: PubMed Central journal article supplement (PMC7188441)
Supplement: develop-147-184069-s1.pdf [file develop-147-184069-s1.pdf]

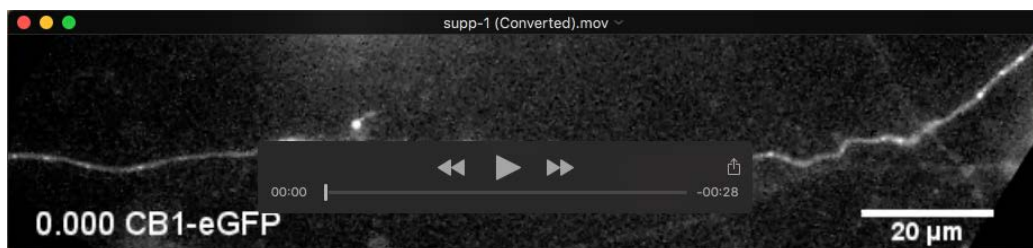

**Movie 1. CB1-eGFP axonal transport in a *KLC1*<sup>+/+</sup> neuron.** Representative live-cell movie of *KLC1*<sup>+/+</sup> hippocampal neuron at DIV7-8 expressing the construct CB1R-eGFP showing the axonal transport of CB1R<sup>+</sup> vesicles. Movie shows the time in seconds (8 frames/sec) and oriented so that right-to-left moving vesicles correspond to anterograde transport and left-to-right correspond to retrograde. Scale bar: 20  $\mu$ m.

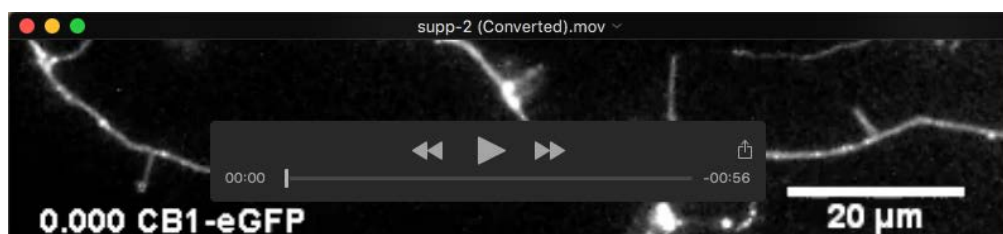

**Movie 2. CB1-eGFP axonal transport in a *KLC1*<sup>-/-</sup> neuron.** Representative live-cell movie of *KLC1*<sup>-/-</sup> hippocampal neuron at DIV7-8 expressing the construct CB1R-eGFP showing the axonal transport of CB1R<sup>+</sup> vesicles. Movie shows the time in seconds (8 frames/sec) and is oriented so that right-to-left moving vesicles correspond to anterograde transport and left-to-right correspond to retrograde. Scale bar: 20  $\mu$ m.

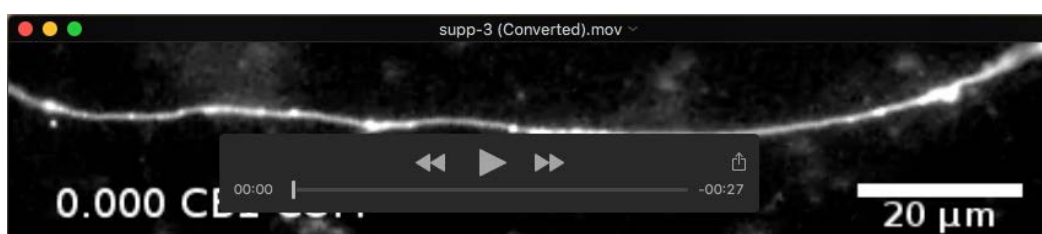

**Movie 3. CB1-eGFP axonal transport in a *KLC1*<sup>-/-</sup> neuron transfected with pcDNA-KLC1-Tap-Tag.** Representative live-cell movie of *KLC1*<sup>-/-</sup> hippocampal neuron at DIV7-8 expressing the construct CB1R-eGFP and pcDNA-KLC1-Tap-Tag showing the axonal transport of CB1R<sup>+</sup> vesicles. Movie shows the time in seconds (8 frames/sec) and is oriented so that right-to-left moving vesicles correspond to anterograde transport and left-to-right correspond to retrograde. Scale bar: 20  $\mu$ m.
